# Supplementary material for: General synthesis of rare-earth orthochromites with quasi-hollow nanostructures and their magnetic properties
Source: Royal Society of Chemistry journal article supplement (doi:10.1039/c3ta12281f), 2013-01-01
Supplement: c3ta12281f.pdf [file c3ta12281f.pdf]

## Supporting Information

### **General Synthesis of Rare-Earth Orthochromites with Quasi-Hollow Nanostructures and Their Magnetic Properties**

Shuijin Lei,<sup>\*a</sup> Lei Liu,<sup>a</sup> Chunying Wang,<sup>a</sup> Chuanning Wang,<sup>a</sup> Donghai Guo,<sup>a</sup> Suyuan Zeng,<sup>b</sup> Baochang Cheng,<sup>a</sup> Yanhe Xiao,<sup>a</sup> and Lang Zhou<sup>a</sup>

<sup>a</sup>*School of Materials Science and Engineering, Nanchang University, Nanchang, Jiangxi 330031, P. R. China*

<sup>b</sup>*School of Chemistry and Chemical Engineering, Liaocheng University, Liaocheng, Shandong 252059, P. R. China*

<sup>\*</sup>To whom correspondence should be addressed. E-mail: shjlei@ncu.edu.cn

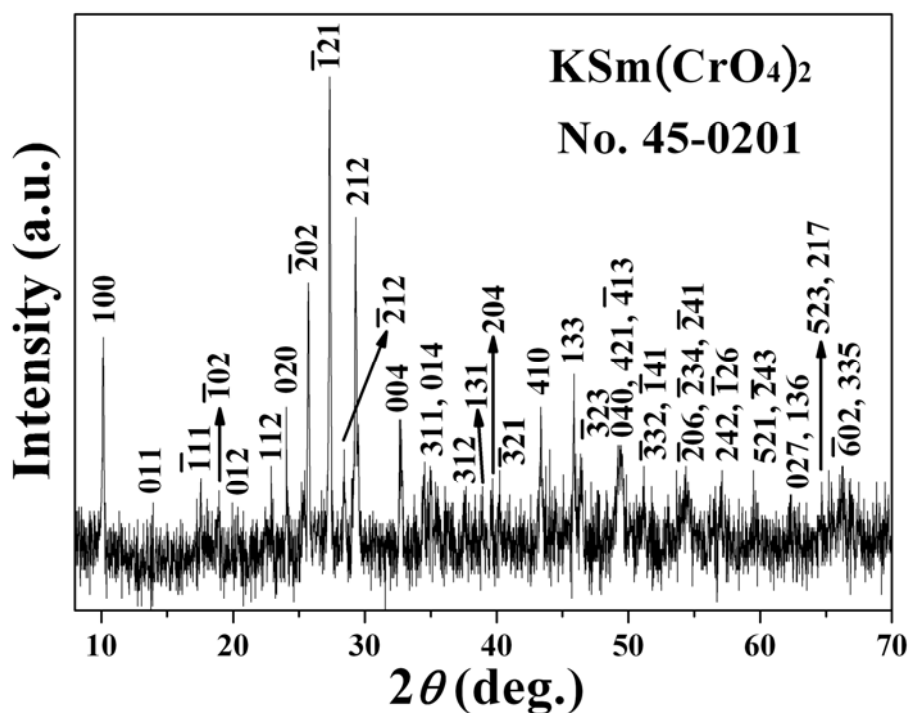

**Figure S1.** XRD patterns of the sample prepared by the direct reaction of K<sub>2</sub>CrO<sub>4</sub> and Sm(NO<sub>3</sub>)<sub>3</sub> aqueous solution at room temperature followed with annealing at 400 °C in nitrogen ambient.

All the diffraction peaks can be indexed to the monoclinic structure of KSm(CrO<sub>4</sub>)<sub>2</sub> with lattice constants of  $a = 8.682 \text{ \AA}$ ,  $b = 7.351 \text{ \AA}$ ,  $c = 10.873 \text{ \AA}$  and  $\beta = 91.83^\circ$ , which are in good agreement with the literature values (JCPDS Card File No. 45-0201,  $a = 8.673 \text{ \AA}$ ,  $b = 7.346 \text{ \AA}$ ,  $c = 10.903 \text{ \AA}$  and  $\beta = 91.89^\circ$ ). No characteristic diffraction peaks due to other impurities can be observed.

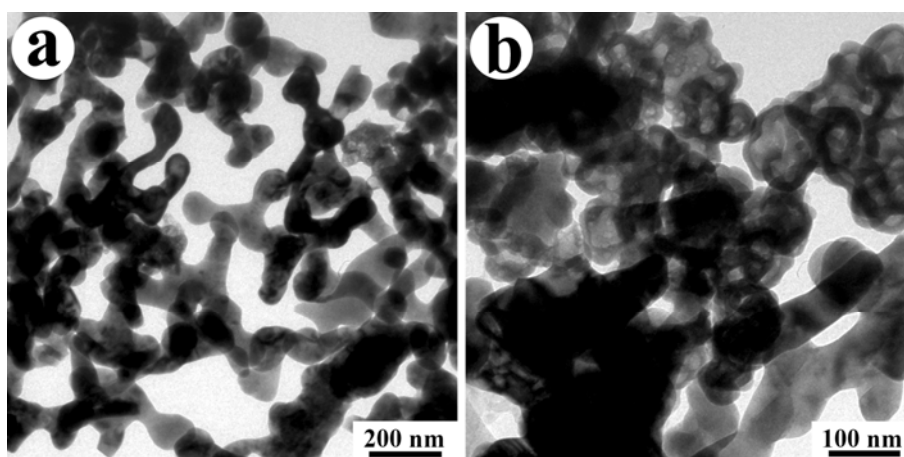

**Figure S2.** TEM images of the EuCrO<sub>3</sub> sample after annealing at 1200 °C in N<sub>2</sub> atmosphere.

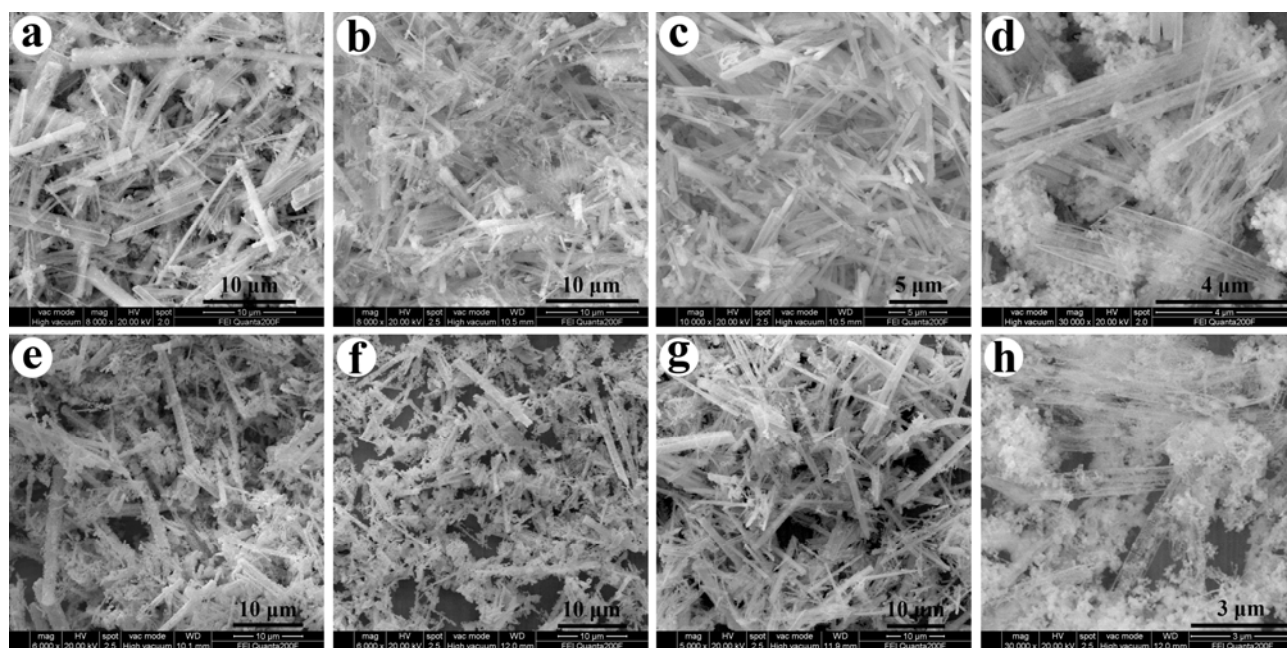

**Figure S3.** SEM images of the as-synthesized samples for (a)  $\text{LaCrO}_3$ , (b)  $\text{PrCrO}_3$ , (c)  $\text{NdCrO}_3$  and (d)  $\text{SmCrO}_3$  before annealing, and the corresponding 800 °C annealing samples for (e)  $\text{LaCrO}_3$ , (f)  $\text{PrCrO}_3$ , (g)  $\text{NdCrO}_3$  and (h)  $\text{SmCrO}_3$ , respectively. Inset in S3e gives a close-up TEM image at high magnification of the annealing  $\text{LaCrO}_3$  sample.

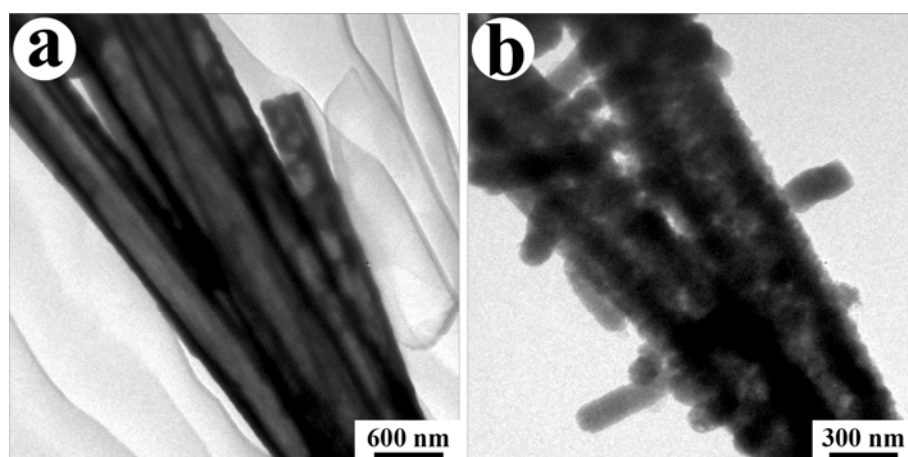

**Figure S4.** TEM images of the as-prepared  $\text{NdCrO}_3$  samples (a) before and (b) after annealing.

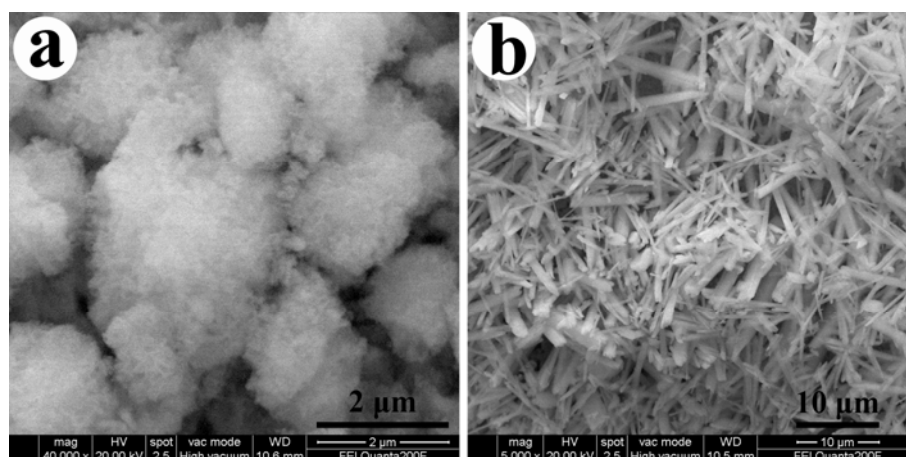

**Figure S5.** SEM images of the representative (a) KEu(CrO<sub>4</sub>)<sub>2</sub> and (b) KNd(CrO<sub>4</sub>)<sub>2</sub> precursors synthesized at room temperature by the direct precipitation between Eu(NO<sub>3</sub>)<sub>3</sub>/Nd(NO<sub>3</sub>)<sub>3</sub> and K<sub>2</sub>CrO<sub>4</sub> aqueous solution.

**Table S1.** Summary of the magnetic data based on the temperature dependence of the magnetization for all the as-prepared rare-earth orthochromites samples via a general solvothermal *in-situ* reduction route

| RCrO <sub>3</sub>  | $T_{N1}$ (K) | $ \Theta $ (K) | $C$   | Experimental $\mu_{\text{eff}} (\mu_B)^a$ | Theoretical $\mu_{\text{eff}} (\mu_B)^b$ | $\mu_{R^{3+}} (\mu_B)^c$ | $\mu_{Cr^{3+}} (\mu_B)^d$ |
|--------------------|--------------|----------------|-------|-------------------------------------------|------------------------------------------|--------------------------|---------------------------|
| LaCrO <sub>3</sub> | 288          | 947            | 3.11  | 5.00                                      | 3.87                                     | 0                        | 3.87                      |
| PrCrO <sub>3</sub> | 239          | 316            | 5.99  | 6.95                                      | 5.27                                     | 3.58                     | 3.87                      |
| NdCrO <sub>3</sub> | 224          | 324            | 4.68  | 6.14                                      | 5.30                                     | 3.62                     | 3.87                      |
| SmCrO <sub>3</sub> | 192          | 502            | 3.89  | 5.60                                      | 3.96                                     | 0.84                     | 3.87                      |
| EuCrO <sub>3</sub> | 181          | 1139           | 22.46 | 13.46                                     | 3.87                                     | 0                        | 3.87                      |
| GdCrO <sub>3</sub> | 167          | 37             | 8.16  | 8.11                                      | 8.83                                     | 7.94                     | 3.87                      |
| DyCrO <sub>3</sub> | 145          | 30             | 14.19 | 10.70                                     | 11.31                                    | 10.63                    | 3.87                      |
| HoCrO <sub>3</sub> | 140          | 25             | 14.10 | 10.67                                     | 11.28                                    | 10.60                    | 3.87                      |
| YCrO <sub>3</sub>  | 140          | 327            | 2.35  | 4.35                                      | 3.87                                     | 0                        | 3.87                      |
| ErCrO <sub>3</sub> | 134          | 106            | 20.83 | 12.96                                     | 10.34                                    | 9.59                     | 3.87                      |
| TmCrO <sub>3</sub> | 124          | 45             | 8.06  | 8.06                                      | 8.50                                     | 7.57                     | 3.87                      |
| YbCrO <sub>3</sub> | 117          | 145            | 4.67  | 6.14                                      | 5.97                                     | 4.54                     | 3.87                      |
| LuCrO <sub>3</sub> | 110          | 369            | 3.00  | 4.92                                      | 3.87                                     | 0                        | 3.87                      |

<sup>a</sup>The effective magnetic moment ( $\mu_{\text{eff}}$ ) in units of the Bohr magneton ( $\mu_B$ ) is evaluated using the formula:  $\mu_{\text{eff}} = (3k_B C / N_A)^{1/2} = 2.84 \cdot C^{1/2}$ , where  $k_B$  is the Boltzmann constant,  $C$  is the Curie constant and  $N_A$  is Avogadro's number. <sup>b</sup>The theoretical value of  $\mu_{\text{eff}}$  is obtained by  $[(\mu_{R^{3+}})^2 + (\mu_{Cr^{3+}})^2]^{1/2}$ . <sup>c</sup> $\mu_{R^{3+}}$  can be calculated by  $g[J(J+1)]^{1/2}$ . <sup>d</sup> $\mu_{Cr^{3+}}$  can be calculated by  $2[S(S+1)]^{1/2}$ , where  $S = 3/2$ .
